# Supplementary material
Source: PubMed Central journal article supplement (PMC4071400)
Supplement: JCI74351sd.pdf [file JCI74351sd.pdf]

**Supplemental Table 1.** Gene array comparison of gp140-specific B cells with strong versus weak pro-resting memory profiles

| Category                           | Gene names | Fold change              | FDR <sup>B</sup> | p-value         |
|------------------------------------|------------|--------------------------|------------------|-----------------|
| Inhibitory Receptors               | FCRL4      | <b>-3.05<sup>A</sup></b> | <b>0.064</b>     | <b>2.60E-02</b> |
|                                    | SIGLEC6    | <b>-3.20</b>             | <b>0.020</b>     | <b>4.33E-03</b> |
|                                    | FCGR2B     | <b>-3.91</b>             | <b>0.020</b>     | <b>2.16E-03</b> |
|                                    | LILRB1     | <b>-2.97</b>             | <b>0.064</b>     | <b>2.60E-02</b> |
|                                    | LILRB2     | <b>-4.61</b>             | <b>0.031</b>     | <b>8.66E-03</b> |
|                                    | CD72       | <b>-3.38</b>             | <b>0.031</b>     | <b>8.66E-03</b> |
|                                    | LAIR1      | -0.04                    | 0.725            | 5.89E-01        |
|                                    | CD84       | <b>-3.72</b>             | <b>0.020</b>     | <b>4.33E-03</b> |
|                                    | PTGER4     | 1.10                     | 0.274            | 1.80E-01        |
| Cell Activation                    | SLAMF7     | -1.99                    | 0.115            | 6.49E-02        |
| Trafficking                        | ITGAX      | <b>-4.71</b>             | <b>0.020</b>     | <b>2.16E-03</b> |
|                                    | SELL       | 1.24                     | 0.274            | 1.80E-01        |
|                                    | CCR7       | -1.01                    | 0.525            | 3.94E-01        |
| Cytokine Receptors                 | IL13RA1    | -1.34                    | 0.525            | 3.78E-01        |
|                                    | IL4R       | -1.47                    | 0.349            | 2.40E-01        |
| Tyrosine Kinases<br>& Phosphatases | HCK        | <b>-4.68</b>             | <b>0.020</b>     | <b>2.16E-03</b> |
|                                    | LCK        | 2.19                     | 0.115            | 6.49E-02        |
|                                    | FGR        | <b>-3.03</b>             | <b>0.048</b>     | <b>1.52E-02</b> |
|                                    | FYN        | <b>-2.87</b>             | <b>0.064</b>     | <b>2.60E-02</b> |
|                                    | PTPN22     | -2.26                    | 0.115            | 6.49E-02        |
|                                    | DUSP4      | 0.69                     | 0.903            | 8.18E-01        |
| Somatic Hypermutation              | AICDA      | <b>-3.55</b>             | <b>0.020</b>     | <b>4.33E-03</b> |
| Transcription Factors              | PBX3       | -1.93                    | 0.115            | 6.49E-02        |
|                                    | SOX5       | <b>-2.74</b>             | <b>0.094</b>     | <b>4.11E-02</b> |
|                                    | BCL11B     | <b>-3.83</b>             | <b>0.020</b>     | <b>4.33E-03</b> |
| Cell Cycle                         | CCNB2      | -0.47                    | 0.725            | 5.89E-01        |
| Cell-cell Signaling                | SEMA4A     | -0.08                    | 1.000            | 1.00E+00        |
| Apoptosis                          | TNFRSF1B   | -1.85                    | 0.157            | 9.31E-02        |
| Cell Energy                        | LAX1       | -0.39                    | 0.799            | 6.99E-01        |

<sup>A</sup>Bold numbers indicate a statistical significant difference in gene expression

<sup>B</sup>Wilcoxon test followed by Benjamini-Hochberg FDR calculation

## Supplemental Figure 1

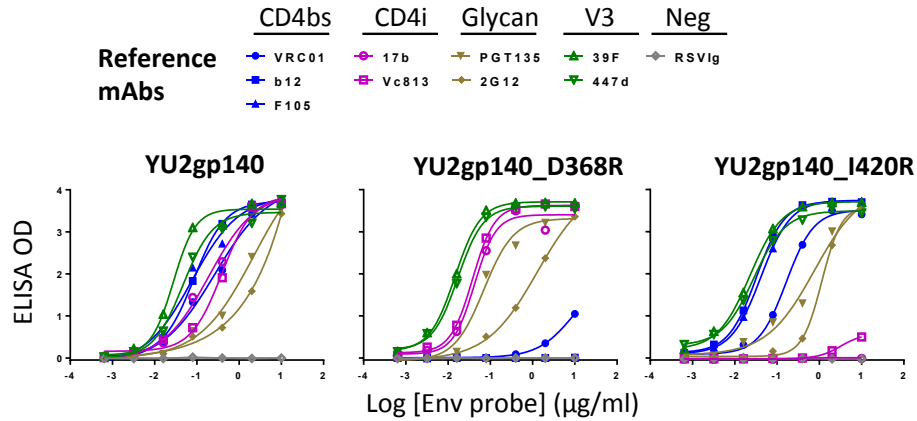

|                  | Binding of YU2gp140FT-Biotin Probes to Selected Antibodies |      |      |      |       |      |      |        |      |              |
|------------------|------------------------------------------------------------|------|------|------|-------|------|------|--------|------|--------------|
|                  | CD4bs                                                      |      |      | CD4i |       | V3   |      | Glycan |      | Neg. Control |
|                  | VRC01                                                      | b12  | F105 | 17b  | Vc813 | 39F  | 447d | PGT135 | 2G12 | RSVlg        |
| YU2gp140FT WT    | +++                                                        | ++++ | ++++ | +++  | +++   | ++++ | ++++ | +++    | +++  | -            |
| YU2gp140FT D368R | +                                                          | -    | -    | ++++ | ++++  | ++++ | ++++ | ++++   | +++  | -            |
| YU2gp140FT I420R | +++                                                        | ++++ | ++++ | -    | +     | ++++ | ++++ | +++    | +++  | -            |

Relative binding of probes was based on the OD<sub>450</sub> values at the highest concentration of protein (10 µg/ml), and EC<sub>50</sub> values:  
 OD<sub>450</sub> ≥ 3.0 and EC<sub>50</sub> ≤ 0.10 = +++; OD<sub>450</sub> ≥ 3.0 and EC<sub>50</sub> > 0.10 = ++; 1.0 ≤ OD<sub>450</sub> < 3.0 = +; 0.2 ≤ OD<sub>450</sub> < 1.0 = +; OD<sub>450</sub> < 0.2 = -

Validation of specificity of YU2-biotin probes by ELISA. ELISA (96-well) plates were coated with 100 µl of HIV-1 Env –specific reference mAbs at 2 µg/ml, followed by addition of five-fold serial dilutions of biotin-labeled YU2gp140 and derivative probes, starting at 10 µg/ml. Bound probe was detected with streptavidin-HRP conjugate (Sigma) and TMB substrate (Invitrogen). Reference mAbs included CD4bs-, CD4-induced (CD4i)-, glycan-, and V3-specific mAbs. The non-HIV mAb RSVlg was used as negative (Neg) control.

### Supplemental Figure 2

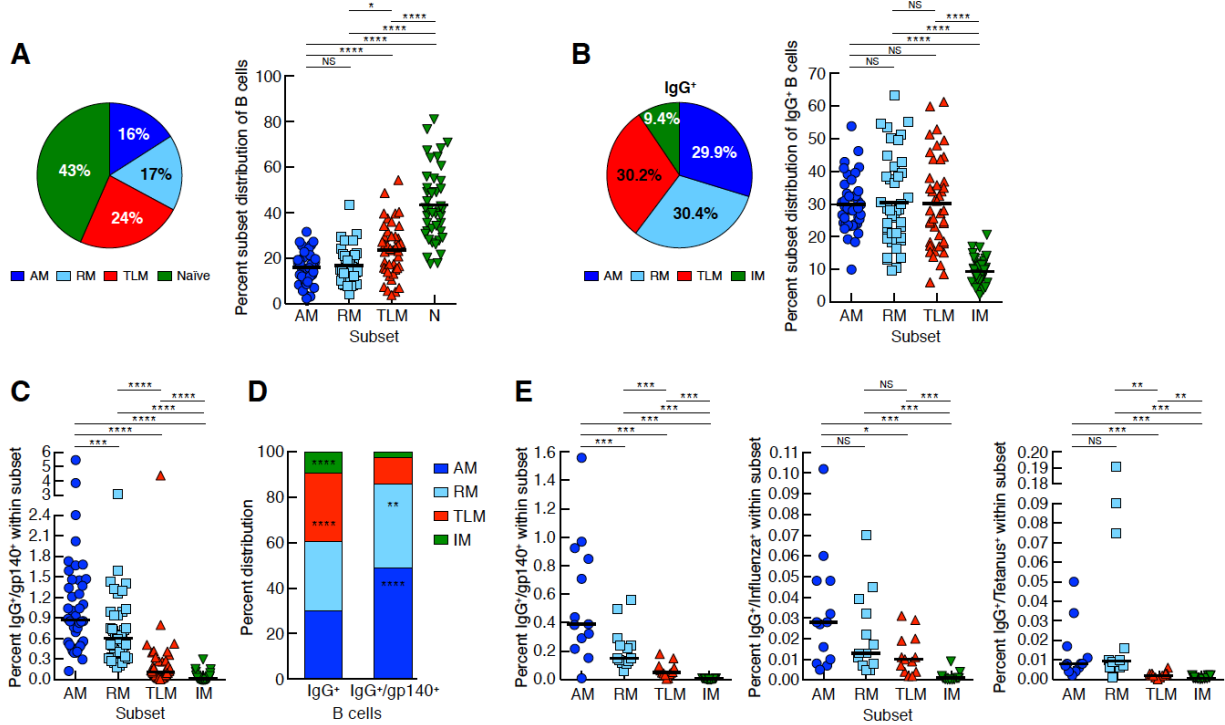

Frequencies of total, IgG<sup>+</sup>, IgG<sup>+</sup>/gp140<sup>+</sup>, IgG<sup>+</sup>/influenza<sup>+</sup> and IgG<sup>+</sup>/tetanus<sup>+</sup> B-cell subsets. Mature (CD10<sup>-</sup>) B cells isolated from the peripheral blood of HIV-infected untreated individuals and stained for CD3, CD20, IgG, CD21, CD27 and probes for gp140, influenza and tetanus. Gates were set on (A) CD20<sup>+</sup> and (B) IgG<sup>+</sup> B cells, followed by determination of the distribution of each subset using markers CD21 and CD27. Pie chart analysis of CD20<sup>+</sup> and IgG<sup>+</sup> B cells by subset and comparison between subsets are shown for the same 42 HIV-viremic individuals as in Figure 3. (C) Comparison between B-cell subsets of gp140-binding within each subset for the same 42 HIV-viremic individuals. (D) Comparison of mean percent distribution among subsets between IgG<sup>+</sup> and IgG<sup>+</sup>/gp140<sup>+</sup> B cells. (E) Comparison between B-cell subsets of gp140-, influenza- or tetanus-binding within each subset for the same 12 HIV-viremic individuals shown in Figure 5. Horizontal bars show mean (A, B) and median (C, E) values and asterisk are for following p-values: \* < 0.05; \*\* < 0.01; \*\*\* < 0.001; \*\*\*\* < 0.0001.

Supplemental Figure 3

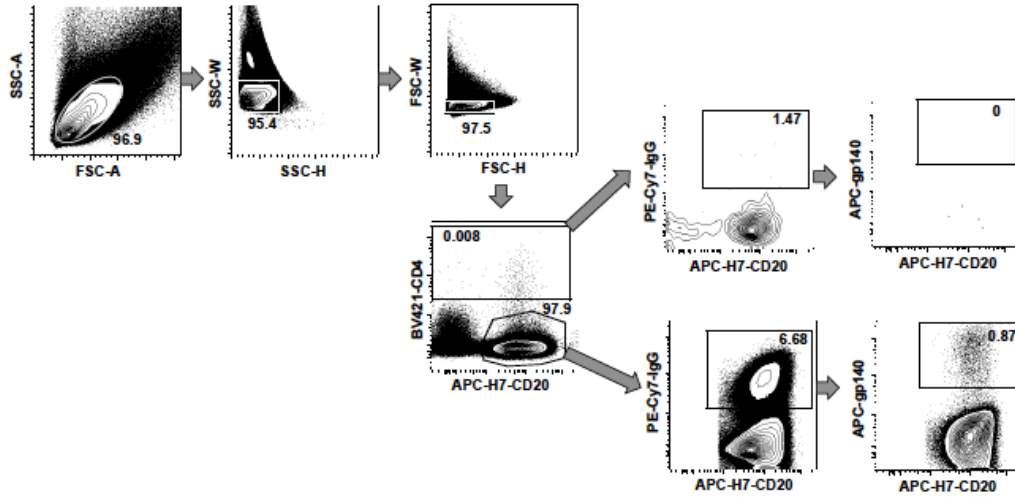

Purity of B cells and absence of CD4-mediated binding to gp140 among IgG<sup>+</sup> B cells. Mature (CD10<sup>-</sup>) B cells isolated from the peripheral blood of a representative HIV-infected individual were stained for CD4, CD20, IgG and the gp140-WT probe. Live cells and singlets were established by forward (FSC) and side (SSC) scatter gating, followed by gating on CD4<sup>+</sup> and CD20<sup>+</sup> cells and determination of percent gp140 binding among IgG/CD20-expressing cells from each gate.
